# Supplementary material for: Novel Cu–Ag bimetallic porous nanomembrane prepared from a multi-component metallic glass
Source: Royal Society of Chemistry journal article supplement (doi:10.1039/c5ra08332j), 2015-01-01
Supplement: c5ra08332j1.pdf [file c5ra08332j1.pdf]

Electronic supplementary information

## **Novel Cu-Ag Bimetallic Porous Nanomembrane Prepared From A Multi-component Metallic Glass**

**Xue Liu,<sup>a</sup> Na Chen,<sup>a</sup> Jia-Lun Gu,<sup>a</sup> Jing Du<sup>b</sup> and Ke-Fu Yao<sup>\*a</sup>**

<sup>a</sup>School of Materials Science and Engineering, Tsinghua University, Beijing 100084, China

<sup>b</sup>Institute of Biomechanics and Medical Engineering, School of Aerospace, Tsinghua University, Beijing 100084, China

\*Corresponding author: Ke-Fu Yao. E-mail: kfyao@tsinghua.edu.cn. Phone:+86-10-62772292. Fax: +86-10-62771160.

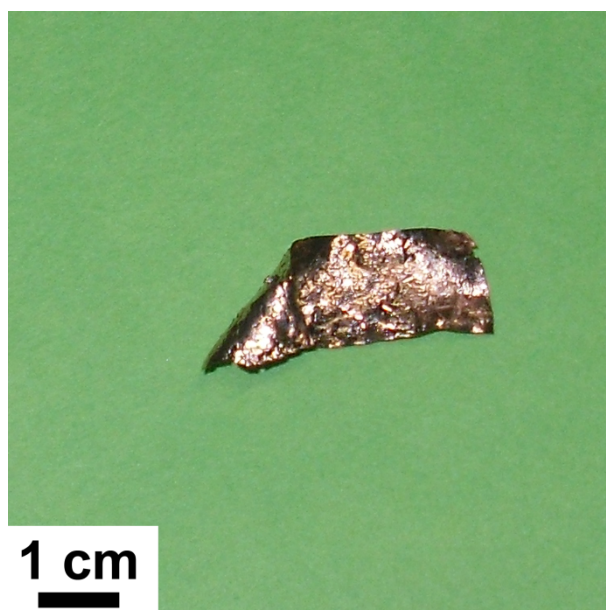

**Fig. S1** Optical image of the deaalloyed sample.

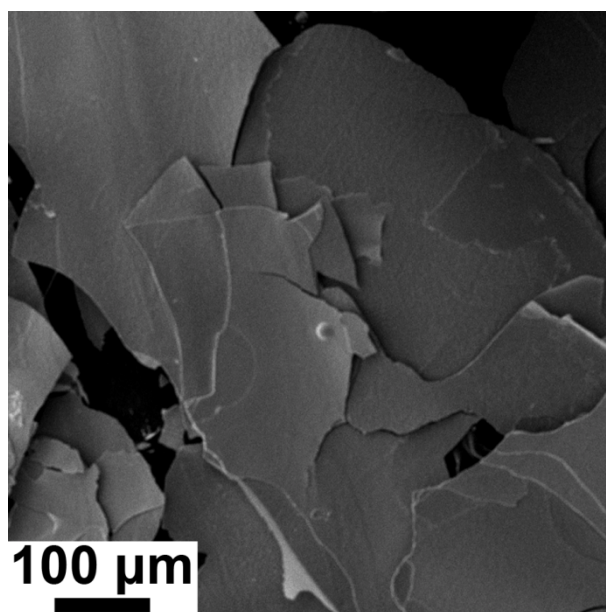

**Fig. S2** Scanning electron microscope (SEM) images of the dealloyed sample.

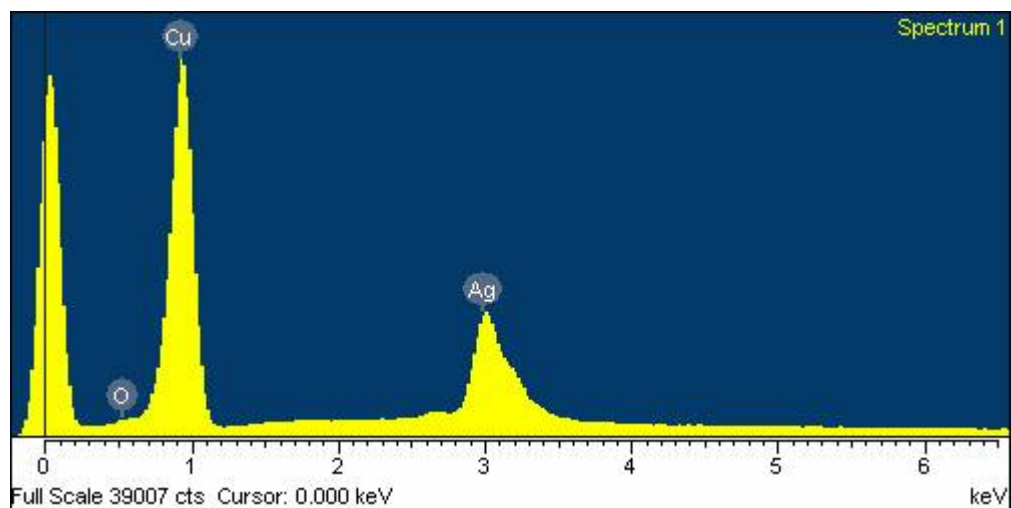

**Fig. S3** Energy dispersive spectrometer (EDS) result of the dealloyed sample.

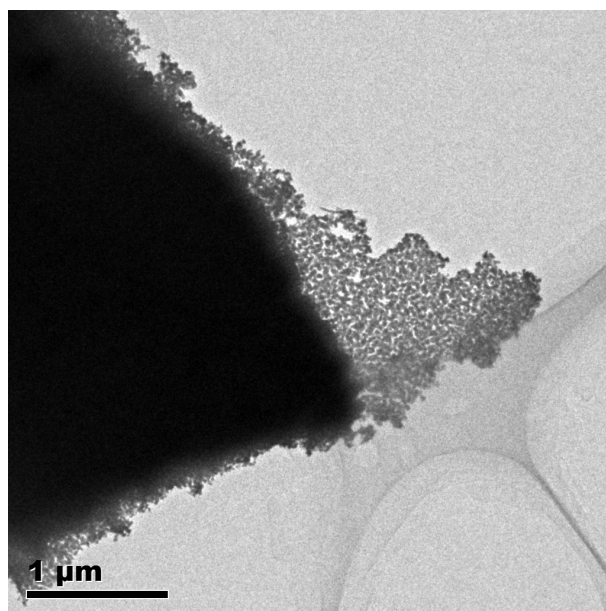

**Fig. S4** Transmission electron microscopy (TEM) bright field image of the Cu-Ag bimetallic porous nanomembrane (PNM).
